# Supplementary material
Source: publisher figshare collection journal article supplement (https://rs.figshare.com/ndownloader/files/25508888)
Supplement: Supplementary file 1 [file 25508888]

clear;close all;
%{
    This code is intended for research purposes.

    Evangelia Nicolaidou, e.nicolaidou@bristol.ac.uk
    2020-10-16
%}

model_no = 1;
main_job_name   = 'main_job';       % template .inp file (*)
eigen_job_name  = 'eigen_job';      % .inp file for eigenanalysis

main_dir = fullfile(pwd,sprintf('model %i',model_no));
main_job_name = fullfile(main_dir,main_job_name);

mkdir temp; cd temp;

%% Create input file
% read template .inp file
fname = [main_job_name,'.inp'];
main_fid = fopen(fname,'rt');
S = textscan(main_fid,'%s','Delimiter','\n');
S = S{1};
fclose(main_fid);

% add commands for matrix generation
S{end+1} = '** ===================== output matrices (EN) =====================';
S{end+1} = '*Step, name=matrix_step';
S{end+1} = '*MATRIX GENERATE, STIFFNESS, MASS';
S{end+1} = '*MATRIX OUTPUT, STIFFNESS, MASS, FORMAT=MATRIX INPUT';
S{end+1} = '*End Step';
S{end+1} = '** ================================================================';

% create .inp file and write additional commands
fname = [eigen_job_name,'.inp'];
eigen_fid = fopen(fname,'wt');
fprintf(eigen_fid,'%s\n',S{:});
fclose(eigen_fid);
fprintf('Input file: %s.inp has been created.\n',eigen_job_name);

%% Get nodes and elements
% read template .inp file
fname = [main_job_name,'.inp'];
fid = fopen(fname,'rt');
S = textscan(fid,'%s','Delimiter','\n');
S = S{1} ;
fclose(fid);

% get key line numbers
idx_node    = find(contains(S,'*Node'));
idx_element = find(contains(S,'*Element'));
idx_end     = find(contains(S,'*End'));
idx_bound   = find(contains(S,'*Boundary'));
idx_star	= find(contains(S,'*'));

% pick nodes 
xyz_nodes = S(idx_node+1:idx_element-1);
xyz_nodes = cell2mat(cellfun(@str2num,xyz_nodes,'UniformOutput',false));
xyz_nodes = xyz_nodes(:,2:end);             % coordinates of each node
N_nodes = length(xyz_nodes);                % number of nodes

% pick elements 
ele_node_index = S(idx_element+1:min(idx_star(idx_star>idx_element))-1);
ele_node_index = cell2mat(cellfun(@str2num,ele_node_index,'UniformOutput',false));
ele_node_index = ele_node_index(:,2:end);	% indices of nodes making up each element
N_ele = length(ele_node_index);             % number of elements

boundary_cmds = S(idx_bound+1);
warning('Check boundary commands!')

%% Run eigenanalysis job
fprintf('%s Abaqus running... %s\n',repmat('=',1,30),repmat('=',1,30))
system(['abaqus job=',eigen_job_name,' interactive']);
fprintf('%s Done. %s\n\n',repmat('=',1,36),repmat('=',1,36))

%% Get matrices, natural frequencies, modeshapes
K_mtx_name = [eigen_job_name,'_STIF1.mtx'];
M_mtx_name = [eigen_job_name,'_MASS1.mtx'];

K_full = getMatrix(K_mtx_name,'full');
M_full = getMatrix(M_mtx_name,'full');

K = K_full;
M = M_full;

N_DOF = size(K,1);          % number of DoFs (including boundary nodes)
if N_DOF ~= 6*N_nodes; error('Something went wrong.'); end

% remove values corresponding to constrained elements
[row,col] = find(K == 1e36);
K(row,:) = [];
K(:,col) = [];
M(row,:) = [];
M(:,col) = [];

% eigenanalysis
[Phi,Lam] = eig(K,M);
om = sqrt(diag(Lam));
N = length(K);              % number of "free" DoFs (excluding boundary nodes)

%% Transform truncated Phi (N x N) to "full" (N_DOF x N) [useful for plotting]
T = eye(N);             % transformation matrix (will end up N_DOF x N)
z_row = zeros(1,N);
for i = 1:length(row)
    r_temp = row(i);
    if r_temp == 1
        T = [z_row; T];
    elseif r_temp == N_DOF
        assert(length(T) == N_DOF-1)
        T = [T; z_row];
    else
        T = [T(1:r_temp-1,:); z_row; T(r_temp:end,:)];
    end
end

Phi_full = T*Phi;

%% Save eigenanalysis results
cd ..; rmdir('temp','s');
close all; save(fullfile(main_dir,'main_data.mat'),'xyz_nodes','N_nodes','end_nodes','x_eq','ele_node_index','N_ele','K_full','K','M_full','M','Phi','Lam','om','N','T','main_job_name','main_dir','boundary_cmds');
